# Supplementary material
Source: PubMed Central journal article supplement (PMC4911881)

## Supplemental Table

**Tab S1. Primers used for real-time PCR**

| Genes              | Primers                                                                    |
|--------------------|----------------------------------------------------------------------------|
| NF- $\kappa$ B p65 | Forward: 5'-ACTGCCAACAGCAGATGGCCCA<br>Reverse: 5'-GCACCAGGTAGTCCACCATGGGAT |
| STAT3              | Forward: 5'-GGCCCCTCGTCATCAAGA<br>Reverse: 5'-TTTGACCAGCAACCTGACTTTAGT     |
| Bcl-2              | Forward: 5'-ATCGCCCTGTGGATGACTGAG<br>Reverse: 5'-CAGCCAGGAGAAATCAAACAGAGG  |
| GAPDH              | Forward: 5'-AAGGACTCATGACCACAGTCCAT<br>Reverse: 5'-CCATCACGCCACAGTTTCC     |

### Supplemental Figure Legend

**Fig S1. Expression levels of NF- $\kappa$ B p65, STAT3 and Bcl-2 in SKOV3 and SKOV3/DDP cells.** SKOV3 and SKOV3/DDP cells were harvested followed by lysate preparation and Western blot analysis with antibodies indicated. GAPDH was used as a loading control.

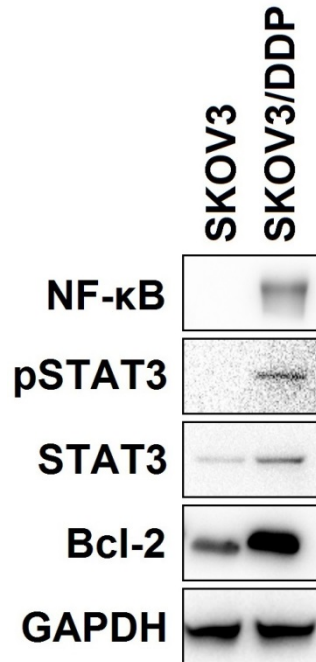

Supplement: jcav07p1133s1.pdf [file jcav07p1133s1.pdf]
